# Supplementary material for: Reconstructing the population history of the Sinhalese, the major ethnic group in Śrī Laṅkā
Source: PubMed Central journal article supplement — iScience. 2023 Sep 1;26(10):107797. doi: 10.1016/j.isci.2023.107797 (PMC10514440; doi:10.1016/j.isci.2023.107797), 2023-09-01
Supplement: mmc1.pdf [file mmc1.pdf]

iScience, Volume 26

## Supplemental information

### Reconstructing the population history of the Sinhalese, the major ethnic group in Śrī Lāṅkā

Prajval Pratap Singh, Sachin Kumar, Nagarjuna Pasupuleti, P.R. Weerasooriya, George van Driem, Kamani H. Tennekoon, Niraj Rai, Gyaneshwer Chaubey, and R. Ranasinghe

Supplementary Data

**Table S1:**  $f_3$ -admix showing source population for A) Sinhalese, and B) Śrī Laṅkā Tamils of UK (STU) with rest of the South Asian populations related to Figures 2 and 3.

| Source1      | Source2           | Target  | $f_3$    | std. Dev | Z      | SNPs   |
|--------------|-------------------|---------|----------|----------|--------|--------|
| Kshatriya    | Ho                | Sinhala | -0.00214 | 0.000251 | -8.525 | 252802 |
| Gujaratis    | Gond              | Sinhala | -0.00143 | 0.000158 | -9.04  | 255048 |
| Kalash       | Jamatia           | Sinhala | -0.00117 | 0.000393 | -2.965 | 253515 |
| Brahmin_WB   | Asur              | Sinhala | -0.00105 | 0.000321 | -3.255 | 252787 |
| Pathan       | Khasi             | Sinhala | -0.00099 | 0.000348 | -2.855 | 253635 |
| Lambadi      | Pulliyar          | Sinhala | -0.0009  | 0.000788 | -1.143 | 245859 |
| Kurmi        | Halakipikki       | Sinhala | -0.00064 | 0.000663 | -0.96  | 245986 |
| UP_Low_Caste | Irula             | Sinhala | -0.00043 | 0.000283 | -1.505 | 251136 |
| Dusadh       | Sakilli           | Sinhala | -0.0004  | 0.000325 | -1.231 | 249749 |
| Santhal      | STU               | Sinhala | -0.00037 | 0.000161 | -2.273 | 254856 |
| Dhurwa       | TN_Low_Caste      | Sinhala | -0.00013 | 0.000841 | -0.156 | 244960 |
| Bengali      | Savara            | Sinhala | 0.000012 | 0.000867 | 0.014  | 244969 |
| Maratha      | Kurumba           | Sinhala | 0.000021 | 0.000315 | 0.065  | 249659 |
| Dharkars     | Piramalai_Kallars | Sinhala | 0.000063 | 0.000252 | 0.248  | 251565 |
| Harijan      | Pallan            | Sinhala | 0.000231 | 0.000192 | 1.203  | 252820 |
| Muslim       | Chenchus          | Sinhala | 0.000351 | 0.000347 | 1.01   | 249125 |
| Kanjars      | Velmas            | Sinhala | 0.000435 | 0.000252 | 1.726  | 251489 |
| Kol          | North_Kannadi     | Sinhala | 0.000656 | 0.00021  | 3.127  | 252405 |
| Brahmin_Guj  | Lambadi           | Sinhala | 0.002073 | 0.000479 | 4.332  | 252356 |
| Brahmin_Man  | Bengali           | Sinhala | 0.002419 | 0.000558 | 4.339  | 251562 |
| Burusho      | Kusundas          | Sinhala | 0.003196 | 0.000324 | 9.872  | 253949 |
| Khatri       | Iyer              | Sinhala | 0.003888 | 0.000222 | 17.515 | 254103 |
| Birhor       | Kadar             | Sinhala | 0.006069 | 0.000303 | 20.049 | 251769 |
| Bonda        | Malayan           | Sinhala | 0.006503 | 0.000606 | 10.736 | 247002 |
| Tharu        | Bonda             | Sinhala | 0.012248 | 0.000395 | 31.026 | 251952 |

## Supplementary Data

|        |         |         |          |          |        |        |
|--------|---------|---------|----------|----------|--------|--------|
| Kharia | Birhor  | Sinhala | 0.014865 | 0.000525 | 28.328 | 248972 |
| Garo   | Burmese | Sinhala | 0.043637 | 0.000642 | 67.985 | 250906 |
| Naga   | Han     | Sinhala | 0.06567  | 0.000816 | 80.467 | 250967 |

| Source1      | Source2           | Target | <i>f3</i> | std.     | Z       | SNPs   |
|--------------|-------------------|--------|-----------|----------|---------|--------|
| Kshatriya    | Ho                | STU    | -0.00152  | 0.000179 | -8.513  | 254873 |
| Kalash       | Jamatia           | STU    | -0.0012   | 0.000313 | -3.837  | 254943 |
| Pathan       | Khasi             | STU    | -0.00092  | 0.000255 | -3.598  | 254919 |
| Gujaratis    | Gond              | STU    | -0.00081  | 0.000073 | -11.086 | 255063 |
| Brahmin_WB   | Asur              | STU    | -0.00066  | 0.000228 | -2.909  | 254835 |
| Lambadi      | Pulliyar          | STU    | -0.00028  | 0.000683 | -0.413  | 254089 |
| Kurmi        | Halakipikki       | STU    | 0.000003  | 0.000559 | 0.005   | 254077 |
| UP_Low_Caste | Irula             | STU    | 0.000208  | 0.000224 | 0.93    | 254759 |
| Dusadh       | Sakilli           | STU    | 0.000236  | 0.000262 | 0.899   | 254699 |
| Dharkars     | Piramalai_Kallars | STU    | 0.000237  | 0.000164 | 1.448   | 254749 |
| Bengali      | Savara            | STU    | 0.000474  | 0.000792 | 0.599   | 254123 |
| Dhurwa       | TN_Low_Caste      | STU    | 0.000704  | 0.000762 | 0.923   | 254336 |
| Maratha      | Kurumba           | STU    | 0.000712  | 0.000242 | 2.937   | 254698 |
| Kanjars      | Velmas            | STU    | 0.000747  | 0.000158 | 4.738   | 254741 |
| Muslim       | Chenchus          | STU    | 0.00094   | 0.000276 | 3.407   | 254688 |
| Harijan      | Pallan            | STU    | 0.000964  | 0.000101 | 9.507   | 254819 |
| Santhal      | Sinhala           | STU    | 0.000987  | 0.000129 | 7.67    | 254856 |
| Kol          | North_Kannadi     | STU    | 0.001216  | 0.000136 | 8.962   | 254804 |
| Brahmin_Guj  | Lambadi           | STU    | 0.002131  | 0.000358 | 5.944   | 254279 |
| Brahmin_Man  | Bengali           | STU    | 0.002446  | 0.00046  | 5.32    | 254380 |
| Khatri       | Iyer              | STU    | 0.003669  | 0.000115 | 31.879  | 254909 |
| Burusho      | Kusundas          | STU    | 0.003747  | 0.000232 | 16.164  | 254934 |
| Birhor       | Kadar             | STU    | 0.007075  | 0.000218 | 32.434  | 254804 |

Supplementary Data

|        |         |     |          |          |        |        |
|--------|---------|-----|----------|----------|--------|--------|
| Bonda  | Malayan | STU | 0.007451 | 0.000519 | 14.371 | 254685 |
| Tharu  | Bonda   | STU | 0.013786 | 0.000323 | 42.728 | 254881 |
| Kharia | Birhor  | STU | 0.015587 | 0.00043  | 36.226 | 254731 |
| Garo   | Burmese | STU | 0.04492  | 0.000551 | 81.481 | 254870 |
| Naga   | Han     | STU | 0.066816 | 0.000734 | 91.068 | 254891 |

(B) **Table S2:** D statistic showing gene flow with various population groups, related to Figures 2 and 3 (A) D statistic with Sinhalese; (B) D statistic with Śrī Laṅkā Tamil from Sri Lanka (STS); (C) D statistic with Śrī Laṅkā Tamil from UK (STU).

| Pop A   | Pop B   | Pop C        | Pop D             | D-Stat  | SD       | Z-Score | ABBA  | BABA  | SNPs   |
|---------|---------|--------------|-------------------|---------|----------|---------|-------|-------|--------|
| Yorubas | Sinhala | Brahmin_Guj  | Gond              | 0.0081  | 0.00095  | 8.493   | 18430 | 18135 | 255057 |
| Yorubas | Sinhala | Kamboj       | Pulliyar          | 0.0114  | 0.001495 | 7.621   | 18550 | 18132 | 255057 |
| Yorubas | Sinhala | Brahmin_WB   | Halakipikki       | 0.0077  | 0.001224 | 6.289   | 18304 | 18024 | 255057 |
| Yorubas | Sinhala | Kshatriya    | Santhal           | 0.0057  | 0.001153 | 4.985   | 18322 | 18112 | 255057 |
| Yorubas | Sinhala | Brahmins_UP  | Chenchus          | 0.0057  | 0.001291 | 4.413   | 18238 | 18032 | 255057 |
| Yorubas | Sinhala | Khatri       | Gadaba            | 0.0073  | 0.002135 | 3.411   | 18564 | 18295 | 254635 |
| Yorubas | Sinhala | Dharkars     | Kadar             | 0.0019  | 0.001055 | 1.802   | 18151 | 18082 | 255057 |
| Yorubas | Sinhala | Dhurwa       | Kurumba           | 0.0039  | 0.00223  | 1.737   | 18110 | 17971 | 254760 |
| Yorubas | Sinhala | UP_Low_Caste | Halakipikki       | 0.0017  | 0.001345 | 1.296   | 18046 | 17983 | 255057 |
| Yorubas | Sinhala | Kanjars      | TN_Low_Caste      | 0.001   | 0.001634 | 0.614   | 18128 | 18091 | 255055 |
| Yorubas | Sinhala | Maratha      | Piramalai_Kallars | -0.0006 | 0.001072 | -0.58   | 18038 | 18060 | 255057 |
| Yorubas | Sinhala | Bengali      | Brahmin_Man       | -0.0067 | 0.002067 | -3.233  | 18040 | 18283 | 254535 |
| Yorubas | Sinhala | Harijan      | Juang             | -0.0063 | 0.001675 | -3.741  | 17868 | 18093 | 255057 |
| Yorubas | Sinhala | Kol          | Kharia            | -0.0076 | 0.001643 | -4.619  | 17923 | 18197 | 255057 |
| Yorubas | Sinhala | Ror          | Onge              | -0.0121 | 0.001772 | -6.813  | 18467 | 18918 | 255057 |
| Yorubas | Sinhala | Korwa        | Khasi             | -0.0115 | 0.001426 | -8.057  | 17603 | 18012 | 255056 |

## Supplementary Data

| <b>Pop A</b> | <b>Pop B</b> | <b>Pop C</b> | <b>Pop D</b>      | <b>D-Stat</b> | <b>SD</b> | <b>Z-Score</b> | <b>ABBA</b> | <b>BABA</b> | <b>SNPs</b> |
|--------------|--------------|--------------|-------------------|---------------|-----------|----------------|-------------|-------------|-------------|
| Yorubas      | STS          | Brahmin_Guj  | Gond              | 0.0062        | 0.001069  | 5.792          | 18422       | 18195       | 255051      |
| Yorubas      | STS          | Kamboj       | Pulliyar          | 0.0091        | 0.00166   | 5.495          | 18541       | 18206       | 255051      |
| Yorubas      | STS          | Brahmin_WB   | Halakipikki       | 0.0063        | 0.001317  | 4.755          | 18310       | 18082       | 255051      |
| Yorubas      | STS          | Kshatriya    | Santhal           | 0.0056        | 0.001306  | 4.285          | 18343       | 18139       | 255051      |
| Yorubas      | STS          | Brahmins_UP  | Chenchus          | 0.0054        | 0.001411  | 3.821          | 18256       | 18060       | 255051      |
| Yorubas      | STS          | Khatri       | Gadaba            | 0.005         | 0.002387  | 2.114          | 18549       | 18363       | 254629      |
| Yorubas      | STS          | Kanjars      | TN_Low_Caste      | 0.0018        | 0.001794  | 1.025          | 18177       | 18110       | 255049      |
| Yorubas      | STS          | UP_Low_Caste | Halakipikki       | 0.0007        | 0.00153   | 0.451          | 18058       | 18033       | 255051      |
| Yorubas      | STS          | Dhurwa       | Kurumba           | 0.0011        | 0.002523  | 0.435          | 18097       | 18057       | 254755      |
| Yorubas      | STS          | Dharkars     | Kadar             | -0.0005       | 0.001141  | -0.464         | 18135       | 18155       | 255051      |
| Yorubas      | STS          | Maratha      | Piramalai_Kallars | -0.0007       | 0.001248  | -0.537         | 18069       | 18094       | 255051      |
| Yorubas      | STS          | Bengali      | Brahmin_Man       | -0.0043       | 0.002204  | -1.935         | 18097       | 18252       | 254529      |
| Yorubas      | STS          | Harijan      | Juang             | -0.0083       | 0.001806  | -4.6           | 17852       | 18151       | 255051      |
| Yorubas      | STS          | Kol          | Kharia            | -0.0086       | 0.001799  | -4.774         | 17933       | 18244       | 255051      |
| Yorubas      | STS          | Ror          | Onge              | -0.0121       | 0.001981  | -6.111         | 18503       | 18957       | 255051      |
| Yorubas      | STS          | Korwa        | Khasi             | -0.0113       | 0.00156   | -7.228         | 17632       | 18034       | 255050      |

## Supplementary Data

| <b>Pop A</b> | <b>Pop B</b> | <b>Pop C</b> | <b>Pop D</b>      | <b>D-Stat</b> | <b>SD</b> | <b>Z-Score</b> | <b>ABBA</b> | <b>BABA</b> | <b>SNPs</b> |
|--------------|--------------|--------------|-------------------|---------------|-----------|----------------|-------------|-------------|-------------|
| Yorubas      | STU          | Brahmin_Guj  | Gond              | 0.006         | 0.000866  | 6.877          | 18389       | 18171       | 255063      |
| Yorubas      | STU          | Kamboj       | Pulliyar          | 0.009         | 0.00166   | 5.495          | 18541       | 18206       | 255051      |
| Yorubas      | STU          | Brahmin_WB   | Halakipikki       | 0.0069        | 0.001103  | 6.226          | 18289       | 18040       | 255063      |
| Yorubas      | STU          | Kshatriya    | Santhal           | 0.0038        | 0.001044  | 3.64           | 18282       | 18143       | 255063      |
| Yorubas      | STU          | Brahmins_UP  | Chenchus          | 0.0052        | 0.001201  | 4.334          | 18227       | 18038       | 255063      |
| Yorubas      | STU          | Khatri       | Gadaba            | 0.0049        | 0.001959  | 2.518          | 18518       | 18336       | 254641      |
| Yorubas      | STU          | Kanjars      | TN_Low_Caste      | 0.0017        | 0.001474  | 1.181          | 18143       | 18080       | 255061      |
| Yorubas      | STU          | UP_Low_Caste | Halakipikki       | 0.0011        | 0.001251  | 0.868          | 18035       | 17996       | 255063      |
| Yorubas      | STU          | Dhurwa       | Kurumba           | 0.0041        | 0.001973  | 2.083          | 18112       | 17964       | 254766      |
| Yorubas      | STU          | Dharkars     | Kadar             | 0.0007        | 0.000957  | 0.713          | 18129       | 18104       | 255063      |
| Yorubas      | STU          | Maratha      | Piramalai_Kallars | 0             | 0.000983  | 0.017          | 18050       | 18050       | 255063      |
| Yorubas      | STU          | Bengali      | Brahmin_Man       | -0.008        | 0.001865  | -4.272         | 18012       | 18301       | 254541      |
| Yorubas      | STU          | Harijan7     | Juang             | -0.0079       | 0.001518  | -5.191         | 17832       | 18115       | 255063      |
| Yorubas      | STU          | Kol          | Kharia            | -0.007        | 0.001484  | -4.722         | 17930       | 18183       | 255063      |
| Yorubas      | STU          | Ror          | Onge              | -0.0143       | 0.001681  | -8.519         | 18427       | 18963       | 255063      |
| Yorubas      | STU          | Korwa        | Khasi             | -0.011        | 0.001288  | -8.548         | 17602       | 17994       | 255062      |



Supplementary Data

|              |     |          |             |          |          |          |     |           |   |            |              |   |              |      |   |           |                  |   |                  |           |   |           |              |   |                  |
|--------------|-----|----------|-------------|----------|----------|----------|-----|-----------|---|------------|--------------|---|--------------|------|---|-----------|------------------|---|------------------|-----------|---|-----------|--------------|---|------------------|
| 9.00E<br>+02 | STU | Gon<br>d | Jamat<br>ia | 0.0<br>1 | 2.<br>25 | 2.<br>33 | 35% | 56.7<br>8 | + | 258.<br>31 | 6.88E<br>-06 | + | 0.001<br>129 | 76.1 | + | 19.<br>16 | 8.27<br>E-<br>06 | + | 3.67<br>E-<br>06 | 53.6<br>4 | + | 14.<br>26 | 1.48E<br>-05 | + | 6.32<br>E-<br>06 |
|--------------|-----|----------|-------------|----------|----------|----------|-----|-----------|---|------------|--------------|---|--------------|------|---|-----------|------------------|---|------------------|-----------|---|-----------|--------------|---|------------------|
